# Supplementary material
Source: publisher figshare collection journal article supplement (https://acs.figshare.com/ndownloader/files/3583458)
Supplement: Supplementary file 1 [file 3583458]

  
data_hh3 
  
_audit_creation_method            SHELXL-97 
_chemical_name_systematic 
; 
 ? 
; 
_chemical_name_common             ? 
_chemical_melting_point           ? 
_chemical_formula_moiety          ?
_chemical_formula_sum 
 'C19 H27 N4 O2.50' 
_chemical_formula_weight          351.45 
  
loop_ 
 _atom_type_symbol 
 _atom_type_description 
 _atom_type_scat_dispersion_real 
 _atom_type_scat_dispersion_imag 
 _atom_type_scat_source 
 'C'  'C'   0.0033   0.0016 
 'International Tables Vol C Tables 4.2.6.8 and 6.1.1.4' 
 'H'  'H'   0.0000   0.0000 
 'International Tables Vol C Tables 4.2.6.8 and 6.1.1.4' 
 'N'  'N'   0.0061   0.0033 
 'International Tables Vol C Tables 4.2.6.8 and 6.1.1.4' 
 'O'  'O'   0.0106   0.0060 
 'International Tables Vol C Tables 4.2.6.8 and 6.1.1.4' 
  
_symmetry_cell_setting            monoclinic 
_symmetry_space_group_name_H-M    C2/c 
  
loop_ 
 _symmetry_equiv_pos_as_xyz 
 'x, y, z' 
 '-x, y, -z+1/2' 
 'x+1/2, y+1/2, z' 
 '-x+1/2, y+1/2, -z+1/2' 
 '-x, -y, -z' 
 'x, -y, z-1/2' 
 '-x+1/2, -y+1/2, -z' 
 'x+1/2, -y+1/2, z-1/2' 
  
_cell_length_a                    13.2127(4) 
_cell_length_b                    14.5710(5) 
_cell_length_c                    37.9181(12) 
_cell_angle_alpha                 90.00 
_cell_angle_beta                  94.5720(10) 
_cell_angle_gamma                 90.00 
_cell_volume                      7276.8(4) 
_cell_formula_units_Z             16 
_cell_measurement_temperature     120(2) 
_cell_measurement_reflns_used     32118 
_cell_measurement_theta_min       2.91 
_cell_measurement_theta_max       27.48 
  
_exptl_crystal_description        block 
_exptl_crystal_colour             colourless 
_exptl_crystal_size_max           0.18 
_exptl_crystal_size_mid           0.16 
_exptl_crystal_size_min           0.10 
_exptl_crystal_density_meas       ? 
_exptl_crystal_density_diffrn     1.283 
_exptl_crystal_density_method     'not measured' 
_exptl_crystal_F_000              3024 
_exptl_absorpt_coefficient_mu     0.087 
_exptl_absorpt_correction_type    multi-scan 
_exptl_absorpt_correction_T_min   0.9016 
_exptl_absorpt_correction_T_max   0.9914 
_exptl_absorpt_process_details    'SADABS 2007/2 (Sheldrick, G.M., 2007)' 

  
_exptl_special_details 
; 
  We are greatful to the EPSRC crystallographic Service for recording the 
data for HH3 
Crystal decay was found to be negligible by by repeating the initial 
frames at the end of data collection and analyzing the duplicate 
reflections. 
  
Hydrogen atoms were added at calculated positions and refined using 
a riding model except the Hs on the amides and water O1 which were 
located in a difference map.  
Anisotropic displacement parameters were used for all 
non-H atoms; H-atoms were given isotropic displacement parameter equal 
to 1.2 (or 1.5 for methyl, NH and OH H-atoms) times the equivalent isotropic 
displacement parameter of the atom to which they are attached. 
; 
  
_diffrn_ambient_temperature        120(2) 
_diffrn_radiation_wavelength       0.71073 
_diffrn_radiation_type             MoK\a
_diffrn_radiation_source                  
'Bruker-Nonius FR591 rotating anode' 
_diffrn_radiation_monochromator   'graphite'
_diffrn_measurement_device_type   
'Bruker-Nonius Roper CCD camera on \k-goniostat' 
_diffrn_measurement_method        '\f & \w scans'
_diffrn_detector_area_resol_mean  '9.091'
_diffrn_standards_number          ? 
_diffrn_standards_interval_count  ? 
_diffrn_standards_interval_time   ? 
_diffrn_standards_decay_%         nil 
_diffrn_reflns_number             32625 
_diffrn_reflns_av_R_equivalents   0.0675 
_diffrn_reflns_av_sigmaI/netI     0.0558 
_diffrn_reflns_limit_h_min        -16 
_diffrn_reflns_limit_h_max        16 
_diffrn_reflns_limit_k_min        -17 
_diffrn_reflns_limit_k_max        17 
_diffrn_reflns_limit_l_min        -46 
_diffrn_reflns_limit_l_max        45 
_diffrn_reflns_theta_min          3.00 
_diffrn_reflns_theta_max          26.00 
_reflns_number_total              7058 
_reflns_number_gt                 5346 
_reflns_threshold_expression      >2sigma(I) 
  
_computing_data_collection        
'COLLECT (Hooft, R.W.W., 1998)' 
_computing_cell_refinement        
'DENZO (Otwinowski & Minor, 1997) & COLLECT (Hooft, R.W.W., 1998)' 
#Although determined using DirAx, the cell is refined in the HKL
#package during data reduction
_computing_data_reduction         
'DENZO (Otwinowski & Minor, 1997) & COLLECT (Hooft, R.W.W., 1998)'  
_computing_structure_solution     'SHELXS-97 (Sheldrick, 1990)' 
_computing_structure_refinement   'SHELXL-97 (Sheldrick, 1997)' 
_computing_molecular_graphics     'SHELXTL (Sheldrick, 1997)' 
_computing_publication_material   'SHELXTL (Sheldrick, 1997)' 
  
_refine_special_details 
; 
 Refinement of F^2^ against ALL reflections.  The weighted R-factor wR and 
 goodness of fit S are based on F^2^, conventional R-factors R are based 
 on F, with F set to zero for negative F^2^. The threshold expression of 
 F^2^ > 2sigma(F^2^) is used only for calculating R-factors(gt) etc. and is 
 not relevant to the choice of reflections for refinement.  R-factors based 
 on F^2^ are statistically about twice as large as those based on F, and R- 
 factors based on ALL data will be even larger. 
; 
  
_refine_ls_structure_factor_coef  Fsqd 
_refine_ls_matrix_type            full 
_refine_ls_weighting_scheme       calc 
_refine_ls_weighting_details 
 'calc w=1/[\s^2^(Fo^2^)+(0.0000P)^2^+33.2735P] where P=(Fo^2^+2Fc^2^)/3' 
_atom_sites_solution_primary      direct 
_atom_sites_solution_secondary    difmap 
_atom_sites_solution_hydrogens    geom 
_refine_ls_hydrogen_treatment     mixed 
_refine_ls_extinction_method      none 
_refine_ls_extinction_coef        ? 
_refine_ls_number_reflns          7058 
_refine_ls_number_parameters      475 
_refine_ls_number_restraints      22 
_refine_ls_R_factor_all           0.1025 
_refine_ls_R_factor_gt            0.0750 
_refine_ls_wR_factor_ref          0.1529 
_refine_ls_wR_factor_gt           0.1374 
_refine_ls_goodness_of_fit_ref    1.058 
_refine_ls_restrained_S_all       1.071 
_refine_ls_shift/su_max           0.000 
_refine_ls_shift/su_mean          0.000 
  
loop_ 
 _atom_site_label 
 _atom_site_type_symbol 
 _atom_site_fract_x 
 _atom_site_fract_y 
 _atom_site_fract_z 
 _atom_site_U_iso_or_equiv 
 _atom_site_adp_type 
 _atom_site_occupancy 
 _atom_site_symmetry_multiplicity 
 _atom_site_calc_flag 
 _atom_site_refinement_flags 
 _atom_site_disorder_assembly 
 _atom_site_disorder_group 
O1 O 0.60893(17) 0.17921(15) 0.12393(6) 0.0293(5) Uani 1 1 d D . . 
H1B H 0.597(3) 0.217(2) 0.1419(7) 0.044 Uiso 1 1 d D . . 
H1A H 0.618(3) 0.215(2) 0.1049(7) 0.044 Uiso 1 1 d D . . 
N101 N 0.44441(17) 0.49659(16) 0.20218(6) 0.0196(5) Uani 1 1 d . . . 
N102 N 0.37658(17) 0.54387(16) 0.18018(6) 0.0193(5) Uani 1 1 d . . . 
C103 C 0.3812(2) 0.51778(18) 0.14581(7) 0.0180(6) Uani 1 1 d . . . 
C104 C 0.3221(2) 0.54661(19) 0.11514(7) 0.0192(6) Uani 1 1 d . . . 
H10A H 0.2702 0.5916 0.1158 0.023 Uiso 1 1 calc R . . 
O105 O 0.29650(14) 0.52436(13) 0.05163(5) 0.0221(4) Uani 1 1 d . . . 
C105 C 0.3450(2) 0.50474(19) 0.08421(7) 0.0189(6) Uani 1 1 d . . . 
C106 C 0.4221(2) 0.4380(2) 0.08312(7) 0.0224(6) Uani 1 1 d . . . 
H10B H 0.4357 0.4120 0.0610 0.027 Uiso 1 1 calc R . . 
C107 C 0.4775(2) 0.4100(2) 0.11306(7) 0.0218(6) Uani 1 1 d . . . 
H10C H 0.5287 0.3645 0.1121 0.026 Uiso 1 1 calc R . . 
C108 C 0.4564(2) 0.45039(19) 0.14542(7) 0.0182(6) Uani 1 1 d . . . 
C109 C 0.4928(2) 0.43992(19) 0.18154(7) 0.0188(6) Uani 1 1 d . . . 
O110 O 0.59313(15) 0.30727(14) 0.17845(5) 0.0244(5) Uani 1 1 d . . . 
C110 C 0.5704(2) 0.3746(2) 0.19597(7) 0.0201(6) Uani 1 1 d . . . 
N111 N 0.61661(18) 0.39262(17) 0.22816(6) 0.0210(5) Uani 1 1 d D . . 
H111 H 0.592(2) 0.4359(18) 0.2399(8) 0.031 Uiso 1 1 d D . . 
C112 C 0.6951(2) 0.3324(2) 0.24478(7) 0.0214(6) Uani 1 1 d . . . 
H11K H 0.7271 0.2987 0.2256 0.026 Uiso 1 1 calc R . . 
C113 C 0.6504(2) 0.2619(2) 0.26865(8) 0.0253(7) Uani 1 1 d . . . 
H11A H 0.6048 0.2204 0.2541 0.030 Uiso 1 1 calc R . . 
H11B H 0.6095 0.2937 0.2857 0.030 Uiso 1 1 calc R . . 
C114 C 0.7345(3) 0.2045(2) 0.28928(8) 0.0316(7) Uani 1 1 d . . . 
H11L H 0.7222 0.1383 0.2834 0.038 Uiso 1 1 calc R . . 
C115 C 0.7331(3) 0.2160(2) 0.32955(8) 0.0314(7) Uani 1 1 d . . . 
H11C H 0.6643 0.2022 0.3367 0.038 Uiso 1 1 calc R . . 
H11D H 0.7811 0.1719 0.3417 0.038 Uiso 1 1 calc R . . 
C116 C 0.7626(2) 0.3129(2) 0.34077(7) 0.0252(7) Uani 1 1 d . . . 
H11E H 0.7710 0.3159 0.3669 0.030 Uiso 1 1 calc R . . 
H11F H 0.7073 0.3555 0.3326 0.030 Uiso 1 1 calc R . . 
C117 C 0.8607(2) 0.3437(2) 0.32589(7) 0.0263(7) Uani 1 1 d . . . 
H11G H 0.9186 0.3094 0.3377 0.032 Uiso 1 1 calc R . . 
H11H H 0.8716 0.4099 0.3308 0.032 Uiso 1 1 calc R . . 
C118 C 0.8559(2) 0.3269(2) 0.28577(8) 0.0303(7) Uani 1 1 d . . . 
H11M H 0.9242 0.3415 0.2776 0.036 Uiso 1 1 calc R . . 
C119 C 0.7771(2) 0.3889(2) 0.26502(7) 0.0248(7) Uani 1 1 d . . . 
H11I H 0.7455 0.4301 0.2817 0.030 Uiso 1 1 calc R . . 
H11J H 0.8119 0.4274 0.2482 0.030 Uiso 1 1 calc R . . 
N120 N 0.8325(2) 0.2309(2) 0.27640(7) 0.0356(7) Uani 1 1 d U . . 
C121 C 0.9135(3) 0.1668(3) 0.28786(10) 0.0553(11) Uani 1 1 d U . . 
H12A H 0.9772 0.1868 0.2787 0.083 Uiso 1 1 calc R . . 
H12B H 0.8960 0.1053 0.2788 0.083 Uiso 1 1 calc R . . 
H12C H 0.9218 0.1652 0.3138 0.083 Uiso 1 1 calc R . . 
C122 C 0.2041(2) 0.5762(2) 0.05150(8) 0.0311(7) Uani 1 1 d . . . 
H12D H 0.1765 0.5860 0.0270 0.047 Uiso 1 1 calc R . . 
H12E H 0.2181 0.6356 0.0629 0.047 Uiso 1 1 calc R . . 
H12F H 0.1548 0.5423 0.0644 0.047 Uiso 1 1 calc R . . 
C123 C 0.3150(2) 0.6166(2) 0.19328(8) 0.0252(6) Uani 1 1 d . . . 
H12G H 0.3271 0.6205 0.2191 0.038 Uiso 1 1 calc R . . 
H12H H 0.2431 0.6035 0.1870 0.038 Uiso 1 1 calc R . . 
H12I H 0.3331 0.6751 0.1827 0.038 Uiso 1 1 calc R . . 
N201 N 0.79170(18) 0.48369(17) 0.04309(6) 0.0226(5) Uani 1 1 d . . . 
N202 N 0.85951(17) 0.53060(17) 0.06516(6) 0.0225(5) Uani 1 1 d . . . 
C203 C 0.8607(2) 0.49920(19) 0.09919(7) 0.0191(6) Uani 1 1 d . . . 
C204 C 0.9193(2) 0.5292(2) 0.12967(7) 0.0219(6) Uani 1 1 d . . . 
H20A H 0.9675 0.5774 0.1291 0.026 Uiso 1 1 calc R . . 
O205 O 0.94960(16) 0.50298(16) 0.19309(5) 0.0305(5) Uani 1 1 d . . . 
C205 C 0.9017(2) 0.4837(2) 0.16036(7) 0.0246(6) Uani 1 1 d . . . 
C206 C 0.8308(2) 0.4112(2) 0.16100(8) 0.0286(7) Uani 1 1 d . . . 
H20B H 0.8212 0.3817 0.1828 0.034 Uiso 1 1 calc R . . 
C207 C 0.7756(2) 0.3824(2) 0.13092(8) 0.0254(6) Uani 1 1 d . . . 
H20C H 0.7290 0.3330 0.1316 0.030 Uiso 1 1 calc R . . 
C208 C 0.7897(2) 0.42796(19) 0.09896(7) 0.0189(6) Uani 1 1 d . . . 
C209 C 0.7497(2) 0.42144(19) 0.06320(7) 0.0194(6) Uani 1 1 d . . . 
O210 O 0.64085(15) 0.29426(13) 0.06673(5) 0.0236(4) Uani 1 1 d . . . 
C210 C 0.6692(2) 0.35845(19) 0.04870(7) 0.0193(6) Uani 1 1 d . . . 
N211 N 0.62802(18) 0.37525(17) 0.01575(6) 0.0222(5) Uani 1 1 d D . . 
H211 H 0.651(2) 0.4199(18) 0.0037(8) 0.033 Uiso 1 1 d D . . 
C212 C 0.5424(2) 0.3220(2) -0.00022(7) 0.0220(6) Uani 1 1 d . . . 
H21M H 0.5089 0.2908 0.0193 0.026 Uiso 1 1 calc R . . 
C213 C 0.5766(2) 0.2481(2) -0.02514(8) 0.0280(7) Uani 1 1 d . . . 
H21A H 0.6203 0.2032 -0.0115 0.034 Uiso 1 1 calc R . . 
H21B H 0.6171 0.2766 -0.0431 0.034 Uiso 1 1 calc R . . 
C214 C 0.4841(2) 0.1976(2) -0.04394(8) 0.0273(7) Uani 1 1 d . . . 
H21K H 0.4906 0.1308 -0.0380 0.033 Uiso 1 1 calc R . . 
C215 C 0.4804(2) 0.2071(2) -0.08435(8) 0.0278(7) Uani 1 1 d . . . 
H21C H 0.5460 0.1869 -0.0927 0.033 Uiso 1 1 calc R . . 
H21D H 0.4264 0.1669 -0.0954 0.033 Uiso 1 1 calc R . . 
C216 C 0.4596(2) 0.3063(2) -0.09576(8) 0.0255(7) Uani 1 1 d . . . 
H21E H 0.5201 0.3443 -0.0888 0.031 Uiso 1 1 calc R . . 
H21F H 0.4474 0.3090 -0.1218 0.031 Uiso 1 1 calc R . . 
C217 C 0.3679(2) 0.3456(2) -0.07897(7) 0.0233(6) Uani 1 1 d . . . 
H21G H 0.3053 0.3159 -0.0896 0.028 Uiso 1 1 calc R . . 
H21H H 0.3628 0.4122 -0.0839 0.028 Uiso 1 1 calc R . . 
C218 C 0.3769(2) 0.32987(19) -0.03883(7) 0.0208(6) Uani 1 1 d . . . 
H21L H 0.3120 0.3508 -0.0295 0.025 Uiso 1 1 calc R . . 
C219 C 0.4647(2) 0.3851(2) -0.01948(7) 0.0210(6) Uani 1 1 d . . . 
H21I H 0.4984 0.4226 -0.0369 0.025 Uiso 1 1 calc R . . 
H21J H 0.4367 0.4273 -0.0022 0.025 Uiso 1 1 calc R . . 
N220 N 0.39099(18) 0.23201(17) -0.02947(6) 0.0242(5) Uani 1 1 d . . . 
C221 C 0.3016(3) 0.1763(2) -0.03910(9) 0.0354(8) Uani 1 1 d U . . 
H22A H 0.2426 0.2031 -0.0289 0.053 Uiso 1 1 calc R . . 
H22B H 0.3128 0.1138 -0.0300 0.053 Uiso 1 1 calc R . . 
H22C H 0.2893 0.1744 -0.0649 0.053 Uiso 1 1 calc R . . 
C222 C 1.0237(2) 0.5741(2) 0.19473(8) 0.0295(7) Uani 1 1 d . . . 
H22D H 1.0574 0.5772 0.2187 0.044 Uiso 1 1 calc R . . 
H22E H 0.9906 0.6329 0.1888 0.044 Uiso 1 1 calc R . . 
H22F H 1.0742 0.5612 0.1778 0.044 Uiso 1 1 calc R . . 
C223 C 0.9185(3) 0.6046(2) 0.05161(9) 0.0367(8) Uani 1 1 d . . . 
H22G H 0.9622 0.5803 0.0341 0.055 Uiso 1 1 calc R . . 
H22H H 0.9606 0.6328 0.0711 0.055 Uiso 1 1 calc R . . 
H22I H 0.8726 0.6509 0.0404 0.055 Uiso 1 1 calc R . . 
  
loop_ 
 _atom_site_aniso_label 
 _atom_site_aniso_U_11 
 _atom_site_aniso_U_22 
 _atom_site_aniso_U_33 
 _atom_site_aniso_U_23 
 _atom_site_aniso_U_13 
 _atom_site_aniso_U_12 
O1 0.0402(13) 0.0255(12) 0.0226(11) -0.0015(9) 0.0044(9) -0.0015(10) 
N101 0.0216(12) 0.0181(12) 0.0180(12) 0.0019(10) -0.0040(9) -0.0013(10) 
N102 0.0197(12) 0.0216(12) 0.0160(12) -0.0001(9) -0.0019(9) 0.0014(10) 
C103 0.0189(13) 0.0174(14) 0.0181(14) 0.0016(11) 0.0039(11) -0.0030(11) 
C104 0.0186(13) 0.0179(14) 0.0205(15) 0.0038(11) -0.0009(11) -0.0005(11) 
O105 0.0257(10) 0.0242(11) 0.0160(10) 0.0029(8) -0.0008(8) 0.0042(9) 
C105 0.0211(14) 0.0200(14) 0.0152(14) 0.0041(11) -0.0018(11) -0.0022(12) 
C106 0.0270(15) 0.0256(16) 0.0146(14) -0.0012(11) 0.0013(11) -0.0004(13) 
C107 0.0232(14) 0.0249(15) 0.0178(14) 0.0007(12) 0.0043(11) 0.0039(12) 
C108 0.0162(13) 0.0210(14) 0.0171(14) 0.0023(11) 0.0003(10) -0.0041(11) 
C109 0.0174(13) 0.0199(14) 0.0191(14) 0.0009(11) 0.0011(11) -0.0026(11) 
O110 0.0283(11) 0.0246(11) 0.0200(10) -0.0026(9) 0.0000(8) 0.0031(9) 
C110 0.0231(14) 0.0232(15) 0.0141(13) -0.0004(11) 0.0022(11) -0.0021(12) 
N111 0.0249(13) 0.0221(13) 0.0153(12) -0.0012(10) -0.0020(9) 0.0064(10) 
C112 0.0198(14) 0.0262(16) 0.0175(14) 0.0003(12) -0.0025(11) 0.0071(12) 
C113 0.0295(16) 0.0230(15) 0.0221(15) 0.0010(12) -0.0066(12) -0.0029(13) 
C114 0.047(2) 0.0181(15) 0.0272(17) -0.0014(13) -0.0141(14) 0.0044(14) 
C115 0.0381(18) 0.0318(18) 0.0232(16) 0.0098(13) -0.0056(13) -0.0022(15) 
C116 0.0295(16) 0.0293(16) 0.0160(14) -0.0020(12) -0.0022(12) 0.0041(13) 
C117 0.0246(15) 0.0331(17) 0.0200(15) 0.0019(13) -0.0051(12) 0.0003(13) 
C118 0.0190(14) 0.052(2) 0.0199(15) 0.0054(14) 0.0023(12) 0.0059(14) 
C119 0.0216(15) 0.0326(17) 0.0199(15) 0.0049(13) -0.0005(12) -0.0037(13) 
N120 0.0359(15) 0.0454(17) 0.0245(14) -0.0051(12) -0.0040(11) 0.0246(13) 
C121 0.061(2) 0.064(2) 0.0396(18) -0.0072(16) -0.0064(16) 0.0339(18) 
C122 0.0353(17) 0.0356(18) 0.0217(16) 0.0018(13) -0.0030(13) 0.0110(15) 
C123 0.0265(15) 0.0252(16) 0.0232(15) -0.0038(12) -0.0020(12) 0.0054(13) 
N201 0.0233(12) 0.0238(13) 0.0196(12) 0.0011(10) -0.0041(10) -0.0015(10) 
N202 0.0213(12) 0.0259(13) 0.0197(13) 0.0030(10) -0.0026(10) -0.0030(10) 
C203 0.0162(13) 0.0193(14) 0.0215(15) -0.0009(11) -0.0005(11) 0.0024(11) 
C204 0.0180(14) 0.0224(15) 0.0250(15) -0.0010(12) 0.0003(11) 0.0007(12) 
O205 0.0298(11) 0.0425(13) 0.0183(11) -0.0007(9) -0.0040(9) -0.0115(10) 
C205 0.0220(14) 0.0330(17) 0.0182(15) -0.0038(12) -0.0017(11) -0.0010(13) 
C206 0.0277(16) 0.0387(18) 0.0193(15) 0.0030(13) 0.0010(12) -0.0092(14) 
C207 0.0237(15) 0.0305(17) 0.0215(15) 0.0018(13) -0.0011(12) -0.0066(13) 
C208 0.0165(13) 0.0196(14) 0.0205(14) -0.0034(11) 0.0011(11) 0.0018(11) 
C209 0.0165(13) 0.0203(14) 0.0213(15) -0.0020(11) 0.0002(11) 0.0035(11) 
O210 0.0292(11) 0.0224(11) 0.0191(10) 0.0013(8) 0.0005(8) -0.0033(9) 
C210 0.0214(14) 0.0190(14) 0.0173(14) -0.0016(11) 0.0014(11) 0.0039(12) 
N211 0.0265(13) 0.0206(13) 0.0188(13) 0.0008(10) -0.0026(10) -0.0042(11) 
C212 0.0260(15) 0.0216(15) 0.0175(14) -0.0006(12) -0.0042(11) -0.0017(12) 
C213 0.0292(16) 0.0250(16) 0.0279(17) -0.0029(13) -0.0086(13) 0.0088(13) 
C214 0.0344(17) 0.0175(15) 0.0282(16) -0.0048(12) -0.0077(13) 0.0004(13) 
C215 0.0281(16) 0.0308(17) 0.0237(16) -0.0095(13) -0.0035(12) 0.0047(14) 
C216 0.0258(15) 0.0318(17) 0.0185(15) -0.0033(12) -0.0002(12) -0.0034(13) 
C217 0.0253(15) 0.0262(16) 0.0172(14) 0.0010(12) -0.0044(11) -0.0020(13) 
C218 0.0228(14) 0.0216(15) 0.0180(14) -0.0016(11) 0.0009(11) 0.0012(12) 
C219 0.0202(14) 0.0227(15) 0.0201(14) -0.0020(12) 0.0005(11) -0.0023(12) 
N220 0.0278(13) 0.0231(13) 0.0208(13) 0.0030(10) -0.0041(10) -0.0085(11) 
C221 0.0419(19) 0.0372(19) 0.0261(17) -0.0005(14) -0.0031(14) -0.0195(16) 
C222 0.0308(16) 0.0321(18) 0.0245(16) -0.0057(13) -0.0044(13) -0.0052(14) 
C223 0.0360(18) 0.040(2) 0.0330(18) 0.0150(15) -0.0062(14) -0.0133(16) 
  
_geom_special_details 
; 
 All esds (except the esd in the dihedral angle between two l.s. planes) 
 are estimated using the full covariance matrix.  The cell esds are taken 
 into account individually in the estimation of esds in distances, angles 
 and torsion angles; correlations between esds in cell parameters are only 
 used when they are defined by crystal symmetry.  An approximate (isotropic) 
 treatment of cell esds is used for estimating esds involving l.s. planes. 
; 
  
loop_ 
 _geom_bond_atom_site_label_1 
 _geom_bond_atom_site_label_2 
 _geom_bond_distance 
 _geom_bond_site_symmetry_2 
 _geom_bond_publ_flag 
O1 H1B 0.896(18) . ? 
O1 H1A 0.904(18) . ? 
N101 C109 1.335(4) . ? 
N101 N102 1.362(3) . ? 
N102 C103 1.364(3) . ? 
N102 C123 1.448(4) . ? 
C103 C108 1.398(4) . ? 
C103 C104 1.412(4) . ? 
C104 C105 1.377(4) . ? 
C104 H10A 0.9500 . ? 
O105 C105 1.376(3) . ? 
O105 C122 1.434(3) . ? 
C105 C106 1.411(4) . ? 
C106 C107 1.363(4) . ? 
C106 H10B 0.9500 . ? 
C107 C108 1.409(4) . ? 
C107 H10C 0.9500 . ? 
C108 C109 1.423(4) . ? 
C109 C110 1.473(4) . ? 
O110 C110 1.235(3) . ? 
C110 N111 1.346(3) . ? 
N111 C112 1.462(3) . ? 
N111 H111 0.852(18) . ? 
C112 C113 1.519(4) . ? 
C112 C119 1.519(4) . ? 
C112 H11K 1.0000 . ? 
C113 C114 1.552(4) . ? 
C113 H11A 0.9900 . ? 
C113 H11B 0.9900 . ? 
C114 N120 1.470(4) . ? 
C114 C115 1.538(4) . ? 
C114 H11L 1.0000 . ? 
C115 C116 1.517(4) . ? 
C115 H11C 0.9900 . ? 
C115 H11D 0.9900 . ? 
C116 C117 1.521(4) . ? 
C116 H11E 0.9900 . ? 
C116 H11F 0.9900 . ? 
C117 C118 1.537(4) . ? 
C117 H11G 0.9900 . ? 
C117 H11H 0.9900 . ? 
C118 N120 1.470(4) . ? 
C118 C119 1.546(4) . ? 
C118 H11M 1.0000 . ? 
C119 H11I 0.9900 . ? 
C119 H11J 0.9900 . ? 
N120 C121 1.460(4) . ? 
C121 H12A 0.9800 . ? 
C121 H12B 0.9800 . ? 
C121 H12C 0.9800 . ? 
C122 H12D 0.9800 . ? 
C122 H12E 0.9800 . ? 
C122 H12F 0.9800 . ? 
C123 H12G 0.9800 . ? 
C123 H12H 0.9800 . ? 
C123 H12I 0.9800 . ? 
N201 C209 1.334(4) . ? 
N201 N202 1.360(3) . ? 
N202 C203 1.368(4) . ? 
N202 C223 1.449(4) . ? 
C203 C208 1.398(4) . ? 
C203 C204 1.409(4) . ? 
C204 C205 1.375(4) . ? 
C204 H20A 0.9500 . ? 
O205 C205 1.376(3) . ? 
O205 C222 1.424(4) . ? 
C205 C206 1.414(4) . ? 
C206 C207 1.370(4) . ? 
C206 H20B 0.9500 . ? 
C207 C208 1.407(4) . ? 
C207 H20C 0.9500 . ? 
C208 C209 1.419(4) . ? 
C209 C210 1.478(4) . ? 
O210 C210 1.234(3) . ? 
C210 N211 1.345(4) . ? 
N211 C212 1.463(4) . ? 
N211 H211 0.861(18) . ? 
C212 C219 1.521(4) . ? 
C212 C213 1.525(4) . ? 
C212 H21M 1.0000 . ? 
C213 C214 1.550(4) . ? 
C213 H21A 0.9900 . ? 
C213 H21B 0.9900 . ? 
C214 N220 1.474(4) . ? 
C214 C215 1.536(4) . ? 
C214 H21K 1.0000 . ? 
C215 C216 1.528(4) . ? 
C215 H21C 0.9900 . ? 
C215 H21D 0.9900 . ? 
C216 C217 1.525(4) . ? 
C216 H21E 0.9900 . ? 
C216 H21F 0.9900 . ? 
C217 C218 1.534(4) . ? 
C217 H21G 0.9900 . ? 
C217 H21H 0.9900 . ? 
C218 N220 1.478(4) . ? 
C218 C219 1.548(4) . ? 
C218 H21L 1.0000 . ? 
C219 H21I 0.9900 . ? 
C219 H21J 0.9900 . ? 
N220 C221 1.455(4) . ? 
C221 H22A 0.9800 . ? 
C221 H22B 0.9800 . ? 
C221 H22C 0.9800 . ? 
C222 H22D 0.9800 . ? 
C222 H22E 0.9800 . ? 
C222 H22F 0.9800 . ? 
C223 H22G 0.9800 . ? 
C223 H22H 0.9800 . ? 
C223 H22I 0.9800 . ? 
  
loop_ 
 _geom_angle_atom_site_label_1 
 _geom_angle_atom_site_label_2 
 _geom_angle_atom_site_label_3 
 _geom_angle 
 _geom_angle_site_symmetry_1 
 _geom_angle_site_symmetry_3 
 _geom_angle_publ_flag 
H1B O1 H1A 107(3) . . ? 
C109 N101 N102 106.0(2) . . ? 
N101 N102 C103 111.5(2) . . ? 
N101 N102 C123 121.4(2) . . ? 
C103 N102 C123 127.0(2) . . ? 
N102 C103 C108 107.0(2) . . ? 
N102 C103 C104 129.8(3) . . ? 
C108 C103 C104 123.2(3) . . ? 
C105 C104 C103 115.1(2) . . ? 
C105 C104 H10A 122.4 . . ? 
C103 C104 H10A 122.4 . . ? 
C105 O105 C122 116.6(2) . . ? 
O105 C105 C104 123.6(2) . . ? 
O105 C105 C106 113.7(2) . . ? 
C104 C105 C106 122.6(2) . . ? 
C107 C106 C105 121.5(3) . . ? 
C107 C106 H10B 119.2 . . ? 
C105 C106 H10B 119.2 . . ? 
C106 C107 C108 118.1(3) . . ? 
C106 C107 H10C 121.0 . . ? 
C108 C107 H10C 121.0 . . ? 
C103 C108 C107 119.5(2) . . ? 
C103 C108 C109 104.5(2) . . ? 
C107 C108 C109 136.0(3) . . ? 
N101 C109 C108 111.0(2) . . ? 
N101 C109 C110 122.3(2) . . ? 
C108 C109 C110 126.8(2) . . ? 
O110 C110 N111 122.0(3) . . ? 
O110 C110 C109 120.4(2) . . ? 
N111 C110 C109 117.6(2) . . ? 
C110 N111 C112 121.9(2) . . ? 
C110 N111 H111 117(2) . . ? 
C112 N111 H111 120(2) . . ? 
N111 C112 C113 111.5(2) . . ? 
N111 C112 C119 110.3(2) . . ? 
C113 C112 C119 111.1(2) . . ? 
N111 C112 H11K 107.9 . . ? 
C113 C112 H11K 107.9 . . ? 
C119 C112 H11K 107.9 . . ? 
C112 C113 C114 111.6(2) . . ? 
C112 C113 H11A 109.3 . . ? 
C114 C113 H11A 109.3 . . ? 
C112 C113 H11B 109.3 . . ? 
C114 C113 H11B 109.3 . . ? 
H11A C113 H11B 108.0 . . ? 
N120 C114 C115 112.5(3) . . ? 
N120 C114 C113 107.8(2) . . ? 
C115 C114 C113 112.1(3) . . ? 
N120 C114 H11L 108.1 . . ? 
C115 C114 H11L 108.1 . . ? 
C113 C114 H11L 108.1 . . ? 
C116 C115 C114 110.9(2) . . ? 
C116 C115 H11C 109.5 . . ? 
C114 C115 H11C 109.5 . . ? 
C116 C115 H11D 109.5 . . ? 
C114 C115 H11D 109.5 . . ? 
H11C C115 H11D 108.1 . . ? 
C115 C116 C117 112.2(3) . . ? 
C115 C116 H11E 109.2 . . ? 
C117 C116 H11E 109.2 . . ? 
C115 C116 H11F 109.2 . . ? 
C117 C116 H11F 109.2 . . ? 
H11E C116 H11F 107.9 . . ? 
C116 C117 C118 110.6(2) . . ? 
C116 C117 H11G 109.5 . . ? 
C118 C117 H11G 109.5 . . ? 
C116 C117 H11H 109.5 . . ? 
C118 C117 H11H 109.5 . . ? 
H11G C117 H11H 108.1 . . ? 
N120 C118 C117 112.5(3) . . ? 
N120 C118 C119 108.2(2) . . ? 
C117 C118 C119 112.5(3) . . ? 
N120 C118 H11M 107.8 . . ? 
C117 C118 H11M 107.8 . . ? 
C119 C118 H11M 107.8 . . ? 
C112 C119 C118 111.4(3) . . ? 
C112 C119 H11I 109.3 . . ? 
C118 C119 H11I 109.3 . . ? 
C112 C119 H11J 109.3 . . ? 
C118 C119 H11J 109.3 . . ? 
H11I C119 H11J 108.0 . . ? 
C121 N120 C118 113.6(3) . . ? 
C121 N120 C114 112.2(3) . . ? 
C118 N120 C114 110.0(2) . . ? 
N120 C121 H12A 109.5 . . ? 
N120 C121 H12B 109.5 . . ? 
H12A C121 H12B 109.5 . . ? 
N120 C121 H12C 109.5 . . ? 
H12A C121 H12C 109.5 . . ? 
H12B C121 H12C 109.5 . . ? 
O105 C122 H12D 109.5 . . ? 
O105 C122 H12E 109.5 . . ? 
H12D C122 H12E 109.5 . . ? 
O105 C122 H12F 109.5 . . ? 
H12D C122 H12F 109.5 . . ? 
H12E C122 H12F 109.5 . . ? 
N102 C123 H12G 109.5 . . ? 
N102 C123 H12H 109.5 . . ? 
H12G C123 H12H 109.5 . . ? 
N102 C123 H12I 109.5 . . ? 
H12G C123 H12I 109.5 . . ? 
H12H C123 H12I 109.5 . . ? 
C209 N201 N202 105.9(2) . . ? 
N201 N202 C203 111.7(2) . . ? 
N201 N202 C223 120.2(2) . . ? 
C203 N202 C223 128.1(2) . . ? 
N202 C203 C208 106.6(2) . . ? 
N202 C203 C204 129.4(3) . . ? 
C208 C203 C204 124.0(3) . . ? 
C205 C204 C203 115.2(3) . . ? 
C205 C204 H20A 122.4 . . ? 
C203 C204 H20A 122.4 . . ? 
C205 O205 C222 116.9(2) . . ? 
C204 C205 O205 124.6(3) . . ? 
C204 C205 C206 122.1(3) . . ? 
O205 C205 C206 113.3(3) . . ? 
C207 C206 C205 121.6(3) . . ? 
C207 C206 H20B 119.2 . . ? 
C205 C206 H20B 119.2 . . ? 
C206 C207 C208 118.3(3) . . ? 
C206 C207 H20C 120.8 . . ? 
C208 C207 H20C 120.8 . . ? 
C203 C208 C207 118.7(3) . . ? 
C203 C208 C209 104.7(2) . . ? 
C207 C208 C209 136.6(3) . . ? 
N201 C209 C208 111.1(2) . . ? 
N201 C209 C210 122.0(2) . . ? 
C208 C209 C210 126.8(3) . . ? 
O210 C210 N211 122.3(3) . . ? 
O210 C210 C209 120.4(2) . . ? 
N211 C210 C209 117.3(2) . . ? 
C210 N211 C212 122.0(2) . . ? 
C210 N211 H211 120(2) . . ? 
C212 N211 H211 118(2) . . ? 
N211 C212 C219 110.4(2) . . ? 
N211 C212 C213 111.9(2) . . ? 
C219 C212 C213 110.6(2) . . ? 
N211 C212 H21M 107.9 . . ? 
C219 C212 H21M 107.9 . . ? 
C213 C212 H21M 107.9 . . ? 
C212 C213 C214 111.0(2) . . ? 
C212 C213 H21A 109.4 . . ? 
C214 C213 H21A 109.4 . . ? 
C212 C213 H21B 109.4 . . ? 
C214 C213 H21B 109.4 . . ? 
H21A C213 H21B 108.0 . . ? 
N220 C214 C215 112.3(2) . . ? 
N220 C214 C213 108.5(2) . . ? 
C215 C214 C213 112.1(3) . . ? 
N220 C214 H21K 107.9 . . ? 
C215 C214 H21K 107.9 . . ? 
C213 C214 H21K 107.9 . . ? 
C216 C215 C214 111.0(2) . . ? 
C216 C215 H21C 109.4 . . ? 
C214 C215 H21C 109.4 . . ? 
C216 C215 H21D 109.4 . . ? 
C214 C215 H21D 109.4 . . ? 
H21C C215 H21D 108.0 . . ? 
C217 C216 C215 111.6(2) . . ? 
C217 C216 H21E 109.3 . . ? 
C215 C216 H21E 109.3 . . ? 
C217 C216 H21F 109.3 . . ? 
C215 C216 H21F 109.3 . . ? 
H21E C216 H21F 108.0 . . ? 
C216 C217 C218 110.9(2) . . ? 
C216 C217 H21G 109.5 . . ? 
C218 C217 H21G 109.5 . . ? 
C216 C217 H21H 109.5 . . ? 
C218 C217 H21H 109.5 . . ? 
H21G C217 H21H 108.0 . . ? 
N220 C218 C217 112.4(2) . . ? 
N220 C218 C219 108.2(2) . . ? 
C217 C218 C219 112.8(2) . . ? 
N220 C218 H21L 107.7 . . ? 
C217 C218 H21L 107.7 . . ? 
C219 C218 H21L 107.7 . . ? 
C212 C219 C218 111.4(2) . . ? 
C212 C219 H21I 109.3 . . ? 
C218 C219 H21I 109.3 . . ? 
C212 C219 H21J 109.3 . . ? 
C218 C219 H21J 109.3 . . ? 
H21I C219 H21J 108.0 . . ? 
C221 N220 C214 113.6(2) . . ? 
C221 N220 C218 113.2(2) . . ? 
C214 N220 C218 109.4(2) . . ? 
N220 C221 H22A 109.5 . . ? 
N220 C221 H22B 109.5 . . ? 
H22A C221 H22B 109.5 . . ? 
N220 C221 H22C 109.5 . . ? 
H22A C221 H22C 109.5 . . ? 
H22B C221 H22C 109.5 . . ? 
O205 C222 H22D 109.5 . . ? 
O205 C222 H22E 109.5 . . ? 
H22D C222 H22E 109.5 . . ? 
O205 C222 H22F 109.5 . . ? 
H22D C222 H22F 109.5 . . ? 
H22E C222 H22F 109.5 . . ? 
N202 C223 H22G 109.5 . . ? 
N202 C223 H22H 109.5 . . ? 
H22G C223 H22H 109.5 . . ? 
N202 C223 H22I 109.5 . . ? 
H22G C223 H22I 109.5 . . ? 
H22H C223 H22I 109.5 . . ? 
  
loop_ 
 _geom_hbond_atom_site_label_D 
 _geom_hbond_atom_site_label_H 
 _geom_hbond_atom_site_label_A 
 _geom_hbond_distance_DH 
 _geom_hbond_distance_HA 
 _geom_hbond_distance_DA 
 _geom_hbond_angle_DHA 
 _geom_hbond_site_symmetry_A 
O1 H1B O110  0.896(18) 1.92(2) 2.805(3) 171(3) . 
O1 H1A O210  0.904(18) 1.897(19) 2.800(3) 177(4) . 
N211 H211 O105  0.861(18) 2.41(2) 3.173(3) 149(3) 5_665 
N111 H111 N101  0.852(18) 2.45(2) 3.203(3) 148(3) 2_655 
C104 H10A O1  0.95 2.52 3.453(4) 165.9 3_455 
C204 H20A O1  0.95 2.41 3.345(4) 170.0 3 
  
_diffrn_measured_fraction_theta_max    0.988 
_diffrn_reflns_theta_full              26.00 
_diffrn_measured_fraction_theta_full   0.988 
_refine_diff_density_max    0.440 
_refine_diff_density_min   -0.358 
_refine_diff_density_rms    0.064 
